# Supplementary material for: Lack of Pituitary Adenylate Cyclase–Activating Polypeptide (PACAP) Disturbs Callus Formation
Source: PubMed Central journal article supplement (PMC8349325; doi:10.1007/s12031-019-01448-z), 2019-12-05
Supplement: 12031_2019_1448_MOESM1_ESM.pdf [file 12031_2019_1448_MOESM1_ESM.pdf]

## Lack of pituitary adenylate cyclase activating polypeptide (PACAP) disturbs callus formation

Gergő Józsa<sup>1</sup>, Balázs Fülöp<sup>1</sup>, László Kovács<sup>1</sup>, Bernadett Czibere<sup>2</sup>, Vince Szegeczki<sup>2</sup>, Tamás Kiss<sup>3</sup>, Tibor Hajdú<sup>2</sup>, Andrea Tamás<sup>1</sup>, Zsuzsanna Helyes<sup>3</sup>, Róza Zákány<sup>2</sup>, Dóra Reglődi<sup>1#</sup>, Tamás Juhász<sup>2\*#</sup>

### Supplementary Figures

#### Statistical Analysis

All data are representative of at least three independent experiments. Where applicable, data are expressed as mean  $\pm$  SEM. Statistical analysis was performed by One Way ANOVA test combined with post hoc tests. Where ANOVA reported significant differences between the groups ( $p < 0.05$ ) a post hoc test (multiple comparison versus control group, Dunnett's method) was used to isolate the groups that differed from the control group at  $p < 0.05$ . The respective control group was the sham operated WT control when comparison was made between WT control, WT callus, PACAP KO, and PACAP KO callus groups, whereas the WT callus was used as control in the post hoc test when comparison was made between WT callus, PACAP KO and PACAP KO callus samples. Statistical analysis and comparison of Western blot and PCR results can be seen in Supplementary Figs 1A, 1B, 1C, 1D, 1E, 1F, 1G, 1H, 1I, 1J, 1K and 1L.

Supplementary Figure 1. For RT-PCR and Western blot reactions, Actin was used as control. Optical density of signals was measured and results were normalised to the optical density of controls. In tables "+" represent significant differences between integrated densities of signals determined by ImageJ software.

| ALP PCR Day 3   | WT | WT callus | PACAP KO | PACAP KO callus |
|-----------------|----|-----------|----------|-----------------|
| WT              |    | +         |          |                 |
| WT callus       |    |           | +        | +               |
| PACAP KO        |    |           |          | +               |
| PACAP KO callus |    |           |          |                 |

Supp Fig 1A

| ALP PCR Day 7   | WT | WT callus | PACAP KO | PACAP KO callus |
|-----------------|----|-----------|----------|-----------------|
| WT              |    | +         | +        |                 |
| WT callus       |    |           |          | +               |
| PACAP KO        |    |           |          | +               |
| PACAP KO callus |    |           |          |                 |

| ALP PCR Day 21  | WT | WT callus | PACAP KO | PACAP KO callus |
|-----------------|----|-----------|----------|-----------------|
| WT              |    |           |          | +               |
| WT callus       |    |           |          |                 |
| PACAP KO        |    |           |          | +               |
| PACAP KO callus |    |           |          |                 |

Supp Fig 1B

| ALP WB Day 3    | WT | WT callus | PACAP KO | PACAP KO callus |
|-----------------|----|-----------|----------|-----------------|
| WT              |    | +         | +        | +               |
| WT callus       |    |           |          |                 |
| PACAP KO        |    |           |          |                 |
| PACAP KO callus |    |           |          |                 |

| ALP WB Day 7    | WT | WT callus | PACAP KO | PACAP KO callus |
|-----------------|----|-----------|----------|-----------------|
| WT              |    | +         |          |                 |
| WT callus       |    |           | +        | +               |
| PACAP KO        |    |           |          |                 |
| PACAP KO callus |    |           |          |                 |

| ALP WB Day 21   | WT | WT callus | PACAP KO | PACAP KO callus |
|-----------------|----|-----------|----------|-----------------|
| WT              |    |           |          |                 |
| WT callus       |    |           |          |                 |
| PACAP KO        |    |           |          |                 |
| PACAP KO callus |    |           |          |                 |

Supp Fig 1C

| Col I PCR Day 3 | WT | WT callus | PACAP KO | PACAP KO callus |
|-----------------|----|-----------|----------|-----------------|
| WT              |    |           | +        | +               |
| WT callus       |    |           | +        | +               |
| PACAP KO        |    |           |          | +               |
| PACAP KO callus |    |           |          |                 |

| Col I PCR Day 7 | WT | WT callus | PACAP KO | PACAP KO callus |
|-----------------|----|-----------|----------|-----------------|
| WT              |    | +         |          | +               |
| WT callus       |    |           |          | +               |
| PACAP KO        |    |           |          | +               |
| PACAP KO callus |    |           |          |                 |

| Col I PCR Day 21 | WT | WT callus | PACAP KO | PACAP KO callus |
|------------------|----|-----------|----------|-----------------|
| WT               |    |           |          | +               |
| WT callus        |    |           |          | +               |
| PACAP KO         |    |           |          | +               |
| PACAP KO callus  |    |           |          |                 |

Supp Fig 1D

| Col I WB Day 3  | WT | WT callus | PACAP KO | PACAP KO callus |
|-----------------|----|-----------|----------|-----------------|
| WT              |    | +         | +        | +               |
| WT callus       |    |           |          |                 |
| PACAP KO        |    |           |          |                 |
| PACAP KO callus |    |           |          |                 |

| Col I WB Day 7  | WT | WT callus | PACAP KO | PACAP KO callus |
|-----------------|----|-----------|----------|-----------------|
| WT              |    | +         |          |                 |
| WT callus       |    |           | +        |                 |
| PACAP KO        |    |           |          |                 |
| PACAP KO callus |    |           |          |                 |

| Col I WB Day 21 | WT | WT callus | PACAP KO | PACAP KO callus |
|-----------------|----|-----------|----------|-----------------|
| WT              |    |           | +        | +               |
| WT callus       |    |           | +        |                 |
| PACAP KO        |    |           |          |                 |
| PACAP KO callus |    |           |          |                 |

Supp Fig 1E

| BMP2 PCR Day 3  | WT | WT callus | PACAP KO | PACAP KO callus |
|-----------------|----|-----------|----------|-----------------|
| WT              |    |           | +        | +               |
| WT callus       |    |           | +        | +               |
| PACAP KO        |    |           |          |                 |
| PACAP KO callus |    |           |          |                 |

| BMP2 PCR Day 7  | WT | WT callus | PACAP KO | PACAP KO callus |
|-----------------|----|-----------|----------|-----------------|
| WT              |    |           |          |                 |
| WT callus       |    |           |          |                 |
| PACAP KO        |    |           |          |                 |
| PACAP KO callus |    |           |          |                 |

| BMP2 PCR Day 21 | WT | WT callus | PACAP KO | PACAP KO callus |
|-----------------|----|-----------|----------|-----------------|
| WT              |    |           |          | +               |
| WT callus       |    |           |          |                 |
| PACAP KO        |    |           |          | +               |
| PACAP KO callus |    |           |          |                 |

Supp Fig 1F

| BMP2 WB Day 3   | WT | WT callus | PACAP KO | PACAP KO callus |
|-----------------|----|-----------|----------|-----------------|
| WT              |    | +         | +        |                 |
| WT callus       |    |           |          | +               |
| PACAP KO        |    |           |          | +               |
| PACAP KO callus |    |           |          |                 |

| BMP2 WB Day 7   | WT | WT callus | PACAP KO | PACAP KO callus |
|-----------------|----|-----------|----------|-----------------|
| WT              |    |           | +        | +               |
| WT callus       |    |           | +        |                 |
| PACAP KO        |    |           |          |                 |
| PACAP KO callus |    |           |          |                 |

| BMP2 WB Day 21  | WT | WT callus | PACAP KO | PACAP KO callus |
|-----------------|----|-----------|----------|-----------------|
| WT              |    | +         |          |                 |
| WT callus       |    |           | +        | +               |
| PACAP KO        |    |           |          |                 |
| PACAP KO callus |    |           |          |                 |

Supp Fig 1G

| BMP4 PCR Day 3  | WT | WT callus | PACAP KO | PACAP KO callus |
|-----------------|----|-----------|----------|-----------------|
| WT              |    | +         | +        |                 |
| WT callus       |    |           | +        | +               |
| PACAP KO        |    |           |          |                 |
| PACAP KO callus |    |           |          |                 |

| BMP4 PCR Day 7  | WT | WT callus | PACAP KO | PACAP KO callus |
|-----------------|----|-----------|----------|-----------------|
| WT              |    | +         |          | +               |
| WT callus       |    |           |          | +               |
| PACAP KO        |    |           |          | +               |
| PACAP KO callus |    |           |          |                 |

| BMP4 PCR Day 21 | WT | WT callus | PACAP KO | PACAP KO callus |
|-----------------|----|-----------|----------|-----------------|
| WT              |    | +         |          |                 |
| WT callus       |    |           | +        | +               |
| PACAP KO        |    |           |          |                 |
| PACAP KO callus |    |           |          |                 |

Supp Fig 1H

| BMP4 WB Day 3   | WT | WT callus | PACAP KO | PACAP KO callus |
|-----------------|----|-----------|----------|-----------------|
| WT              |    | +         |          | +               |
| WT callus       |    |           | +        | +               |
| PACAP KO        |    |           |          | +               |
| PACAP KO callus |    |           |          |                 |

| BMP4 WB Day 7   | WT | WT callus | PACAP KO | PACAP KO callus |
|-----------------|----|-----------|----------|-----------------|
| WT              |    | +         | +        | +               |
| WT callus       |    |           | +        | +               |
| PACAP KO        |    |           |          |                 |
| PACAP KO callus |    |           |          |                 |

| BMP4 WB Day 21  | WT | WT callus | PACAP KO | PACAP KO callus |
|-----------------|----|-----------|----------|-----------------|
| WT              |    | +         |          |                 |
| WT callus       |    |           | +        | +               |
| PACAP KO        |    |           |          |                 |
| PACAP KO callus |    |           |          |                 |

Supp Fig 1I

| BMP6 PCR Day 3  | WT | WT callus | PACAP KO | PACAP KO callus |
|-----------------|----|-----------|----------|-----------------|
| WT              |    |           |          |                 |
| WT callus       |    |           |          |                 |
| PACAP KO        |    |           |          |                 |
| PACAP KO callus |    |           |          |                 |

| BMP6 PCR Day 7  | WT | WT callus | PACAP KO | PACAP KO callus |
|-----------------|----|-----------|----------|-----------------|
| WT              |    | +         | +        |                 |
| WT callus       |    |           |          | +               |
| PACAP KO        |    |           |          | +               |
| PACAP KO callus |    |           |          |                 |

| BMP6 PCR Day 21 | WT | WT callus | PACAP KO | PACAP KO callus |
|-----------------|----|-----------|----------|-----------------|
| WT              |    | +         |          | +               |
| WT callus       |    |           | +        |                 |
| PACAP KO        |    |           |          | +               |
| PACAP KO callus |    |           |          |                 |

Supp Fig 1J

| BMP6 WB Day 3   | WT | WT callus | PACAP KO | PACAP KO callus |
|-----------------|----|-----------|----------|-----------------|
| WT              |    |           |          | +               |
| WT callus       |    |           |          | +               |
| PACAP KO        |    |           |          | +               |
| PACAP KO callus |    |           |          |                 |

| BMP6 WB Day 7   | WT | WT callus | PACAP KO | PACAP KO callus |
|-----------------|----|-----------|----------|-----------------|
| WT              |    | +         |          |                 |
| WT callus       |    |           | +        | +               |
| PACAP KO        |    |           |          |                 |
| PACAP KO callus |    |           |          |                 |

| BMP6 WB Day 21  | WT | WT callus | PACAP KO | PACAP KO callus |
|-----------------|----|-----------|----------|-----------------|
| WT              |    | +         |          | +               |
| WT callus       |    |           |          | +               |
| PACAP KO        |    |           |          | +               |
| PACAP KO callus |    |           |          |                 |

Supp Fig 1K

| Smad1 PCR Day 3 | WT | WT callus | PACAP KO | PACAP KO callus |
|-----------------|----|-----------|----------|-----------------|
| WT              |    | +         |          |                 |
| WT callus       |    |           | +        | +               |
| PACAP KO        |    |           |          |                 |
| PACAP KO callus |    |           |          |                 |

| Smad1 PCR Day 7 | WT | WT callus | PACAP KO | PACAP KO callus |
|-----------------|----|-----------|----------|-----------------|
| WT              |    | +         |          |                 |
| WT callus       |    |           |          | +               |
| PACAP KO        |    |           |          |                 |
| PACAP KO callus |    |           |          |                 |

| Smad1 PCR Day 21 | WT | WT callus | PACAP KO | PACAP KO callus |
|------------------|----|-----------|----------|-----------------|
| WT               |    | +         |          | +               |
| WT callus        |    |           | +        |                 |
| PACAP KO         |    |           |          | +               |
| PACAP KO callus  |    |           |          |                 |

Supp Fig 1L

| Smad1 WB Day 3  | WT | WT callus | PACAP KO | PACAP KO callus |
|-----------------|----|-----------|----------|-----------------|
| WT              |    |           |          |                 |
| WT callus       |    |           |          |                 |
| PACAP KO        |    |           |          |                 |
| PACAP KO callus |    |           |          |                 |

| Smad1 WB Day 7  | WT | WT callus | PACAP KO | PACAP KO callus |
|-----------------|----|-----------|----------|-----------------|
| WT              |    |           |          | +               |
| WT callus       |    |           |          | +               |
| PACAP KO        |    |           |          | +               |
| PACAP KO callus |    |           |          |                 |

| Smad1 WB Day 21 | WT | WT callus | PACAP KO | PACAP KO callus |
|-----------------|----|-----------|----------|-----------------|
| WT              |    |           | +        | +               |
| WT callus       |    |           | +        | +               |
| PACAP KO        |    |           |          |                 |
| PACAP KO callus |    |           |          |                 |
